# Supplementary material
Source: PubMed Central journal article supplement (PMC6408256)

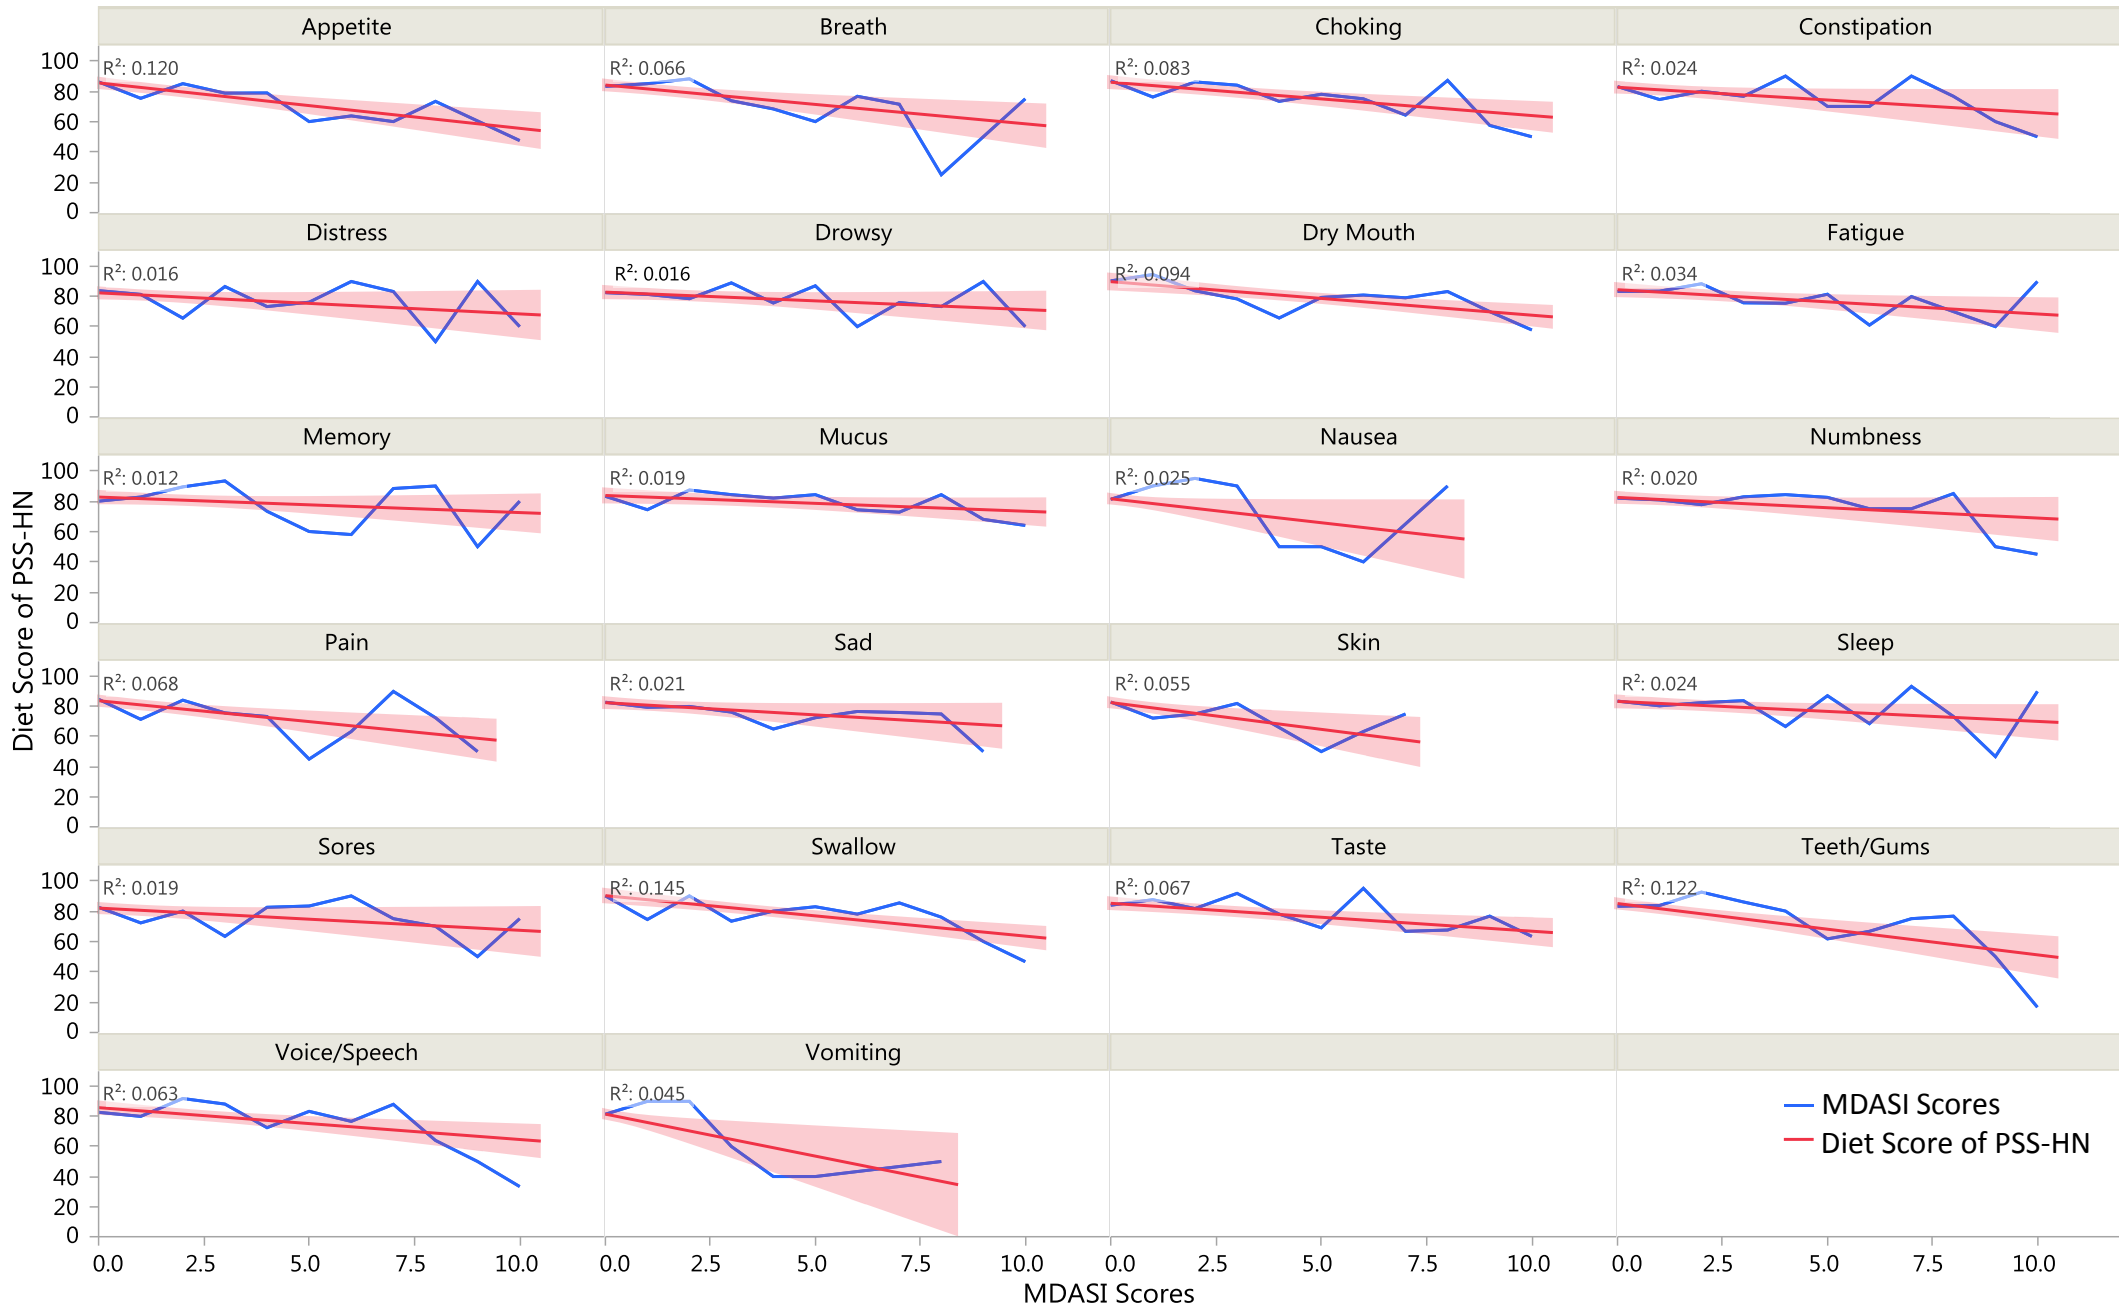

Supplement: NIHMS1506748-supplement-520_2018_4434_MOESM1_ESM.pdf [file NIHMS1506748-supplement-520_2018_4434_MOESM1_ESM.pdf]
